# Supplementary material for: Extrapulmonary Nontuberculous Mycobacteria Infections in Hospitalized Patients, United States, 2009–2014
Source: PubMed Central journal article supplement (PMC7920686; doi:10.3201/eid2703.201087), 2021-03
Supplement: 20-1087-Techapp-s1.pdf [file 20-1087-Techapp-s1.pdf]

# Extrapulmonary Nontuberculous Mycobacterial Infections in Hospitalized Patients, United States, 2009–2014

## Appendix

**Appendix Table 1.** Hospital characteristics of Cerner *HealthFacts* hospitals reporting extrapulmonary nontuberculous mycobacteria compared to all inpatient facilities, and the American Hospital Association (AHA) Acute Care Hospitals, 2014<sup>1</sup>

| Hospital characteristic | Study hospitals |                   | All Cerner inpatient facilities 2009-2014 |                | AHA hospitals |                    |
|-------------------------|-----------------|-------------------|-------------------------------------------|----------------|---------------|--------------------|
|                         | N=89            | % of study cohort | N=378                                     | % of hospitals | N=4810        | % of AHA hospitals |
| Geographic region       |                 |                   |                                           |                |               |                    |
| Midwest                 | 20              | 22                | 76                                        | 20             | 1096          | 23                 |
| Northeast               | 25              | 28                | 72                                        | 19             | 598           | 12                 |
| South                   | 32              | 36                | 128                                       | 34             | 2168          | 45                 |
| West                    | 12              | 13                | 102                                       | 27             | 948           | 20                 |
| Teaching status         |                 |                   |                                           |                |               |                    |
| Teaching                | 52              | 58                | 111                                       | 29             | 1425          | 30                 |
| Nonteaching             | 32              | 36                | 241                                       | 64             | 3385          | 70                 |
| Unknown                 | 5               | 6                 | 26                                        | 7              | N/A           | N/A                |
| AHA hospital size*      |                 |                   |                                           |                |               |                    |
| Small (<200)            | 27              | 30                | 270                                       | 71             | 2606          | 54                 |
| Medium (200-499)        | 52              | 58                | 84                                        | 22             | 1939          | 40                 |
| Large (≥500)            | 10              | 11                | 23                                        | 6              | 265           | 6                  |

\*Hospital size for 1 Cerner facility was unknown

**Appendix Table 2.** Breakdown of collection sources and sites for extrapulmonary nontuberculous mycobacterial infections in hospitalized patients, United States, 2009-2014.

| Collection Site     | Collection source |
|---------------------|-------------------|
|                     | Sterile SST       |
| Abdominal           | Lymph Node        |
| Femur               | Mass              |
| Groin               | Tissue            |
| Heart               | Wound             |
| Liver               |                   |
| Lymph node          |                   |
| Neck                |                   |
| Pericardial fluid   |                   |
| Shoulder            |                   |
| Spleen              |                   |
| Subclavian catheter |                   |
| Unknown             |                   |
|                     | Nonsterile SST    |
| Collection site     | Collection source |
| Abdominal           | Arm               |
| Abscess             | Boil              |
| Ankle               | Chest             |
| Arm                 | Ear               |
| Axilla              | Foot              |
| Back                | Hip               |
| Bone                | Incision          |
| Breast              | Knee              |
| Buttock             | Leg               |
| Calf                | Mass              |
| Cervical            | Neck              |
| Chest               | Node              |
| Ear                 | Other             |
| Elbow               | Skin              |
| Face                | Sternal           |

| Collection Site      | Collection source   |
|----------------------|---------------------|
| Fine needle aspirate | Swab                |
| Finger               | Thigh               |
| Foot                 | Thumb               |
| Forearm              | Tissue              |
| Groin                | Unknown             |
| Hand                 | Wound               |
| Head                 | Wrist               |
| Hip                  |                     |
| Humerus              |                     |
| Ileum                |                     |
| Knee                 |                     |
| Leg                  |                     |
| Lesion               |                     |
| Lumbar               |                     |
| Lymph node           |                     |
| Mass                 |                     |
| Muscle               |                     |
| Neck                 |                     |
| Other                |                     |
| Pharynx              |                     |
| Recipient            |                     |
| Rib                  |                     |
| Sacral               |                     |
| Scalp                |                     |
| Shoulder             |                     |
| Spinal               |                     |
| Sternal              |                     |
| Submandibular gland  |                     |
| Thigh                |                     |
| Thumb                |                     |
| Tibia                |                     |
| Tissue               |                     |
| Toe                  |                     |
| Vulva                |                     |
| Wound                |                     |
| Wrist                |                     |
| Unknown              |                     |
| <b>Disseminated</b>  |                     |
| Ankle                | Blood               |
| Antecubital          | Blood Capillary     |
| Arm                  | Blood Line          |
| Blood                | Blood Peripheral    |
| Blood peripheral     | Blood venous        |
| Blood venous         | Blood whole         |
| Bone                 | Bone                |
| Bone marrow          | Bone marrow         |
| Catheter             | Central Line        |
| Central line         | Cerebrospinal fluid |
| Cerebrospinal fluid  | Joint fluid         |
| Elbow                | Other               |
| Femur                | Synovial Fluid      |
| Foot                 | Unknown             |
| Forearm              |                     |
| Hand                 |                     |
| Hip                  |                     |
| Iliac crest          |                     |
| Knee                 |                     |
| Leg                  |                     |
| Line blood           |                     |
| Lumbar               |                     |
| Lumen                |                     |
| Other                |                     |
| Picc line            |                     |
| Port                 |                     |
| Port-a-cath          |                     |
| Subclavian           |                     |
| Vertebra             |                     |
| Wrist                |                     |
| Unknown              |                     |

**Appendix Table 3.** Microbiology procedures isolating extrapulmonary nontuberculous mycobacteria, hospitalized patients, United States, 2009-2014

---

| Lab procedure names                                         |
|-------------------------------------------------------------|
| Aerobic Culture Bacteria Identified Unspecified             |
| Aerobic/Anaerobic Culture, Wound                            |
| AFB Culture                                                 |
| AFB Culture Abscess                                         |
| AFB Culture and Smear/Stain                                 |
| AFB Culture Blood                                           |
| AFB Culture CSF                                             |
| AFB Culture Tissue                                          |
| Anaerobe+Aerobe Bacteria Identified Unspecified Culture     |
| Anaerobic Culture Bacteria Identified Unspecified           |
| Bartonella Identified Unspecified Organism Specific Culture |
| Blood Culture                                               |
| Blood Culture AFB                                           |
| Blood Culture ARD                                           |
| Blood Culture Fungus                                        |
| Culture Abscess                                             |
| Culture and Gram Stain Aerobic/Anaerobic                    |
| Culture and Gram Stain CSF                                  |
| Culture and Gram Stain Tissue                               |
| Culture and Gram Stain Wound                                |
| Culture Biopsy                                              |
| Culture Ear                                                 |
| Culture Miscellaneous                                       |
| Culture Routine                                             |
| Culture Tissue                                              |
| Culture Wound                                               |
| Fungal Culture and Stain                                    |
| Fungal Culture Bone Marrow                                  |
| Fungal Culture Tissue                                       |
| Fungal Identified Unspecified Culture                       |
| Unknown                                                     |

---

**Appendix Table 4.** Distribution of coinfections by body source for hospitalized patients with extrapulmonary nontuberculous mycobacteria, United States, 2009–2014\*

| Coinfection                       | Blood   | CNS    | Sterile   |            | SST    | Not sterile |       | Sterile abdominal | Not sterile abdominal | Other sterile | Not sterile |         | Pulmonary | Urine |
|-----------------------------------|---------|--------|-----------|------------|--------|-------------|-------|-------------------|-----------------------|---------------|-------------|---------|-----------|-------|
|                                   |         |        | bone/join | bone/joint |        | SST         | other |                   |                       |               |             |         |           |       |
| <i>Acinetobacter</i>              | 6 (67)  | 0      | 1 (11)    | 0          | 0      | 1 (11)      | 0     | 0                 | 0                     | 0             | 1 (11)      | 0       | 0         |       |
| <i>Aeromonas</i>                  | 0       | 0      | 0         | 0          | 0      | 2 (67)      | 0     | 0                 | 0                     | 0             | 1 (33)      | 0       | 0         |       |
| <i>Aspergillus</i>                | 2 (25)  | 0      | 0         | 0          | 0      | 2 (25)      | 0     | 0                 | 0                     | 0             | 2 (25)      | 2 (25)  | 0         |       |
| <i>Bacillus</i>                   | 5 (33)  | 0      | 1 (7)     | 0          | 0      | 4 (27)      | 0     | 1 (7)             | 0                     | 0             | 4 (27)      | 0       | 0         |       |
| <i>Candida</i>                    | 23 (20) | 0      | 0         | 0          | 5 (4)  | 20 (18)     | 5 (4) | 5 (4)             | 13 (12)               | 0             | 24 (21)     | 0       | 18 (16)   |       |
| <i>Clostridium</i>                | 1 (11)  | 0      | 0         | 0          | 1 (11) | 1 (11)      | 0     | 3 (33)            | 0                     | 0             | 3 (33)      | 0       | 0         |       |
| <i>Coccidioides</i>               | 0       | 0      | 0         | 0          | 0      | 0           | 0     | 0                 | 0                     | 0             | 2 (100)     | 0       | 0         |       |
| <i>Corynebacterium</i>            | 2 (5)   | 0      | 0         | 0          | 2 (5)  | 10 (27)     | 2 (5) | 0                 | 3 (8)                 | 0             | 14 (38)     | 0       | 4 (11)    |       |
| <i>Cryptococcus</i>               | 4 (50)  | 2 (25) | 0         | 0          | 0      | 1 (13)      | 0     | 0                 | 1 (13)                | 0             | 0           | 0       | 0         |       |
| <i>Enterobacter</i>               | 2 (13)  | 0      | 0         | 0          | 1 (7)  | 5 (33)      | 0     | 0                 | 0                     | 0             | 3 (20)      | 0       | 4 (27)    |       |
| <i>Enterococcus</i>               | 16 (17) | 1 (1)  | 1 (1)     | 0          | 2 (2)  | 25 (27)     | 4 (4) | 6 (6)             | 3 (3)                 | 3 (3)         | 15 (16)     | 0       | 20 (22)   |       |
| <i>E. coli</i>                    | 7 (13)  | 0      | 0         | 0          | 1 (2)  | 5 (9)       | 3 (6) | 3 (6)             | 3 (6)                 | 3 (6)         | 9 (17)      | 3 (6)   | 20 (37)   |       |
| <i>Klebsiella</i>                 | 2 (5)   | 0      | 0         | 0          | 1 (3)  | 9 (24)      | 0     | 2 (5)             | 2 (5)                 | 2 (5)         | 7 (18)      | 7 (18)  | 8 (21)    |       |
| <i>Mycobacterium tuberculosis</i> | 13 (17) | 0      | 2 (3)     | 1 (1)      | 5 (7)  | 17 (22)     | 2 (3) | 7 (9)             | 6 (8)                 | 6 (8)         | 21 (28)     | 0       | 2 (3)     |       |
| <i>Pseudomonas</i>                | 7 (10)  | 0      | 0         | 0          | 2 (3)  | 12 (18)     | 1 (1) | 3 (4)             | 4 (6)                 | 4 (6)         | 11 (16)     | 20 (29) | 8 (12)    |       |
| <i>Salmonella</i>                 | 1 (33)  | 0      | 0         | 0          | 0      | 0           | 0     | 1 (33)            | 0                     | 0             | 1 (33)      | 0       | 0         |       |
| <i>Staphylococcus</i>             | 28 (19) | 0      | 1 (1)     | 0          | 4 (3)  | 40 (28)     | 3 (2) | 0                 | 0                     | 0             | 34 (24)     | 17 (12) | 17 (12)   |       |
| <i>Stenotrophomonas</i>           | 4 (33)  | 0      | 0         | 0          | 0      | 1 (8)       | 0     | 0                 | 1 (8)                 | 1 (8)         | 1 (8)       | 5 (42)  | 0         |       |
| <i>Streptococcus</i>              | 19 (28) | 0      | 0         | 0          | 2 (3)  | 13 (19)     | 1 (1) | 2 (3)             | 2 (3)                 | 2 (3)         | 13 (19)     | 3 (4)   | 13 (19)   |       |

\*CNS, central nervous system; SST, skin/soft tissue.
